# Supplementary material for: Molecular characterization of acquired resistance to KRAS G12C inhibition in gastrointestinal cancers
Source: Research Square preprint supplement (doi:10.21203/rs.3.rs-1236956/v1), 2022-01-12
Supplement: Supplementary file 1 [file 74c114db002aba92f3fed725.xlsx]

## Sheet: Resistant Cell Lines Sequencing
Cell line	Parental line genetic alterations	Resistant subline genetic alterations
C-106	KRAS G12C	KRAS G12C
	ERBB3 V104M	ERBB3 V104M
	TP53 T125M	TP53 T125M
	APC Q1237Efs*	APC Q1237Efs*
	APC H1490Lfs*	APC H1490Lfs*
	ACVR2A F117I	ACVR2A F117I
	GATA1 P410L	GATA1 P410L
	BRCA2 E2856A	BRCA2 E2856A
	ERCC4 S246L	ERCC4 S246L
	TET2 L34F	TET2 L34F
	PIK3C2G *1446Sext*4	PIK3C2G *1446Sext*4
	PIK3C2G L669F	PIK3C2G L669F
	HNF1A E48K	HNF1A E48K
	NSD1 M2261T	NSD1 M2261T
	NSD1 A2546T	NSD1 A2546T
	RECQL4 V799M	RECQL4 V799M
	BRCA2 T1915M	BRCA2 T1915M
	POT1 Q301H	POT1 Q301H
	MGA R330G	MGA R330G
	EPHB1 T21M	EPHB1 T21M
	ABRAXAS1 D373N	ABRAXAS1 D373N
	NSD1 M2250I	NSD1 M2250I
	POLE R259H	POLE R259H
	NEGR1 Y347S	NEGR1 Y347S
	GATA1 G99S	GATA1 G99S
	SLFN11 R489C	SLFN11 R489C
	USP8 A348T	USP8 A348T
	HLA-C L180D	HLA-C L180D
	CDK12 E405K	CDK12 E405K
	DROSHA P764S	DROSHA P764S
	RAC1 M164I	RAC1 M164I
	FAM86B2 R270W	FAM86B2 R270W
	SLFN13 R489C	SLFN13 R489C
	SCEL N529S	SCEL N529S
	OR11H12 L235I	NRAS G12D
	OR11H12 M243T	PAK5 DEL
	TUBB8 A185V
	NCOR1 DEL
	16p AMP
	15q AMP
RW7213	KRAS G12C	KRAS G12C
	SMAD4 R361C	SMAD4 R361C
	TP53 L257R	TP53 L257R
	HLA-A D207Tfs*	HLA-A D207Tfs*
	TET2 E971*	TET2 E971*
	TCF7L2 H29Ffs*	TCF7L2 H29Ffs*
	APC V1320Cfs*	APC V1320Cfs*
	BRCA1 D693N	BRCA1 D693N
	ZFHX3 L379V	ZFHX3 L379V
	HLA-A V189E	HLA-A V189E
	PIK3C2G V1290G	PIK3C2G V1290G
	ERCC5 V597L	ERCC5 V597L
	PDCD1 A215V	PDCD1 A215V
	STAT3 G126E	STAT3 G126E
	ATM E2444K	ATM E2444K
	ABRAXAS1 D373N	ABRAXAS1 D373N
	ATM E2444K	ATM E2444K
	MGA A606V	MGA A606V
	MLH1 Y379C	MLH1 Y379C
	SDHD H50R	SDHD H50R
	HLA-C A348V	HLA-C A348V
	USP8 A348T	USP8 A348T
	HLA-C M331K	HLA-C M331K
	MYCN S287F	MYCN S287F
	FANCA R163C	FANCA R163C
	RAD54L E718Rfs*	RAD54L E718Rfs*
	JAK1 V985F	JAK1 V985F
	KMT2D D2092G	KMT2D D2092G
	IGF1 R180S	IGF1 R180S
	ALK R1575H	ALK R1575H
	MST1R X627_splice	MST1R X627_splice
	OR5D14 R236H	OR5D14 R236H
	NSFL1C D290N	NSFL1C D290N
	BAGE2 X571_splice	BAGE2 X571_splice
	FAM86C1 G104R	FAM86C1 G104R
	ZFP90 M413T	ZFP90 M413T
	LATS1 X670_splice	KMT2C D372V
	HLA-B N104I	NOTCH1 Q1684H
	OR5D14 G191S	FAM86C1 P135L
	ZNF608 P625L	OR11H12 L235I
		OR11H12 M243T
		ZNF559-ZNF177 H31L
		KRAS AMP
	13q AMP	13q AMP
	6p AMP	6p AMP
	17q AMP	MCL1 AMP
		RIT1 AMP
		SETDB1 AMP
		PMS1 AMP
*no normal is available for the cell lines to remove germline alterations
Genetics alterations identified by oncoKB (Chakravarty et al, 2017).
Alterations detected in the resistant deriveatives are marked in red
