# Supplementary material for: Molecular characterization of acquired resistance to KRAS G12C inhibition in gastrointestinal cancers
Source: Research Square preprint supplement (doi:10.21203/rs.3.rs-1236956/v1), 2022-01-12
Supplement: Supplementary file 2 [file e7eebc41859b22a61cb6a9b7.xlsx]

## Sheet: Yaeger et al., Fig2-4 ED Fig3
Figure 2a and 4b
CRC - KRAS G12Ci + EGFR ab						PROGRESSION			4 weeks off drugs
week	-5	6	12	18	24	30	36	42	46
KRAS G12C	9.6	0.4	2.2	11.2	19.7	31.7	54.9	54.6	27.1
TP53 R273C	21.4	0.5	0.9	6.7	15	33.7	71.1	59.4	57.3
APC R1450*	17.4	0.7	0.6	5.5	12.3		68.9	55.8	51.4
SMAD4 C115S	13.2	0.4	0.5	4	9.1	22	59.9	49	43.1
PIK3CA P104L	6.6	0.09	0.4	3	6.4	15.8	33	24	18.7
PIK3CA H1047R	2.4	0.06	0.04	0.2	0.5	2	2.7	5.8	7.8
PIK3CA E542K	1.7		0.02	0.05	0.2	1.4	8.3	9.6	5.7
PIK3CA E545Q	0.3				0.02				0.04
KRAS G12S			0.1	0.1	0.7	0.5	0.5	0.3	0.8
KRAS G12A			0.04	0.1	0.2	0.1	0.08		0.06
TSC1 R1093*			0.2		0.1	0.2
KRAS R68S				0.2
ERBB2 E363V						0.5	0.5	0.7
KRAS H95L						0.2	0.1	0.2	0.4
RHEB S180L						0.3	0.7	1.6	2.5
NOTCH1 C63Y						0.3	1.6	1.2	0.9
KRAS G13D							0.04
NRAS Q61K							0.03		0.03
BRAF V600E							0.03		0.09
FGFR2 I654V							1
PTEN R142W							0.4	1.5	0.4
APC R332Q							0.4	0.1	0.1
BRCA1 S689C							0.3
TSC1 Y271*								0.5
MET D1030N								0.3
ESR1 V103M								0.2
EGFR I491T									4
MET V103M									0.1
EGFR G465E									0.3
KRAS G12D									0.03
KRAS G12V									0.03
PTEN C124F									0.2
PTEN K125Q									0.2
BRCA1 K351N									0.2
FGFR1 I239fs									0.1
KRAS AMP				2.7	3.3	5.8	10.2	11.1	5.7
MYC AMP						2.6
MET AMP					2.6	3.1		3.6
CCNE AMP							3.5	3	2.9
FGFR1 AMP							3.1	2.8	2.5
EGFR AMP							2.7	2.5	2.6
CEA		19.1	25.2	19.4	35.2	53.1	168.4	237.6	388.5
Figure 2b
CRC - KRAS G12Ci + EGFR ab				PROGRESSION
week	1	6	12	18
KRAS G12C	1.2	0.9	11.8	17.1
TP53 R248W	0.7	0.5	8	34.7
TP53 splice site	1.6	2.8	2.7	2.6
GNAS R201C	1.4	1.1	14.4	42.5
ARID1A P928L	0.4	0.5		0.3
CHEK2 R145Q	0.5	0.3		0.2
MYC AMP^				4.6	^present in tissue at baseline
KRAS AMP				5.8
NTRK1 H298Q				0.2
CEA	436.1	25.7	74.5	781
Figure 2c
CRC - KRAS G12Ci + EGFR ab						PROGRESSION
week	0	6	12	18	24	28
KRAS G12C	49.2	0.2	1.5	2.2	32.7	47.2
TP53 R248Q	51.1	0.3	0.9	2.1	35.6	47.7
BRCA1 G394S	0.3
ATM D1485V ^		0.2	1.3	1.6	14.4	22	^present in tissue at baseline
APC R1523fs ^	37.5		0.3	1.3	20.2	32.7
TERT D516G		0.2
NF1 T676P		0.1
NF1 R2637*				0.2
CCDC6-RET				0.2	3.9	5.3
KRAS R68S					0.1
KRAS G12V					0.08	0.1
BRAF V600E					0.3
SEC23A-BRAF					0.08
KRAS H95Q					0.5	1.1
KRAS G12R						0.08
MAP2K1 R47_E62delinsQ						1
CEA	319.4	5.9	4.7	6.2	18.7	50.7
Figure 2d and 4a
pancreas cancer - KRAS G12Ci monotherapy								PROGRESSION
week	0	6	12	18	24	drug holiday	28	30
KRAS G12C	6.1	0	0.2	5	35.1		5.1	27.8
TP53 P151T	7.8	0	0	0.6	3.9		0.9	4.2
EGFR E114K		0.3
EGFR AMP					3.3		3.1	5.9
KRAS AMP					2.5			2.5
NOTCH1 T654S					0.3
TP53 V216M							0.7	0.9
Ca 19-9	1897	1226	1482	1754	2400			6149
Figure 4c
CRC - KRAS G12Ci + EGFR ab		PROGRESSION
week	0^	12	4 weeks off drugs	16	^week 0 MSK ACCESS
KRAS G12C	63.13	87.3		69.8
TP53 R213*	77.19	52.8		74.3
SMAD4 R361H	79.47	55.2		75.6
APC R805*	44.96	26.7		33.9
APC R1450*	35.4	30.6		38
PIK3CA E545K	38.98	34.2		41.2
KRAS AMP		9.6		4.1
BRAF V600E		0.01		0.02
MET-ATXN7L1 fusion				0.01
EGFR AMP		2.2		2.6
SMAD4 E167D		0.3		0.4
ERBB2 K591M		0.3		0.3
NOTCH1 L2166P				0.2
FBXW7 W446L				0.2
AHCYL2-MET fusion		0.06		0.02
KIT D579E		0.1
CDK12 E398D		0.3
KRAS G12R		0.01
AR L635R		0.1
ARID1A P198T		0.1
EGFR T790M		0.01
SMAD4 P472fs		0.1
MET-SLC12A9 fusion		0.01
MYC AMP		3.3
CTNNB1 R661P		50		71.1
Extended Data Figure 3a
CRC - KRAS G12Ci + EGFR ab
week	0	6	12	18	24	30
KRAS G12C	26.7				0.3	0.4
APC E1309fs	29.2					0.5
APC G253fs	13.3
PDGFRA P553S	0.1
NF1 A706V			0.1	0.1		0.2
FANCA A889V				0.2		0.3
TP53 H115fs					0.1	0.7
KRAS G12V						0.2
CEA	143.2	6.2	4.4	3.3	3.6	4
Extended Data Figure 3b
small bowel cancer - KRAS G12Ci monotherapy
week	0	3	6	12	18	24	30	36
KRAS G12C	8.7	1.5	3.3	1.7	1.2	1.7	1.9	2.2
APC T1556fs	10	1.8	2.6	1.3	0.8	1.8	1.8	2.4
APC A647fs	8.5	1.8	2.3	1.1	0.7	1.2	1.7	2.3
BRAF C194G			0.1
KRAS G12D						0.06
MAP2K1 R201C							0.2
KRAS G12V								0.06
CEA			3.8		2.3	2.5	2.8	3.6
